# Supplementary material for: An Integrated Database of Small RNAs and Their Interplay With Transcriptional Gene Regulatory Networks in Corynebacteria
Source: Front Microbiol. 2021 Jun 17;12:656435. doi: 10.3389/fmicb.2021.656435 (PMC8247434; doi:10.3389/fmicb.2021.656435)
Supplement: Supplementary file 4 [file Table_3.XLSX]

## Sheet: Sheet1
sRNA	Genomic coordinates	Nucleotide Sequence
scjk2061.1	2060398 - 2060512	AGCTTTTTTCGCGTCGGAACTCGACCCACAACGTCGGAAATGATCCGGTTCATCGATGAATACCGGAATCGTTTCTCTGTCGAGTTCATCTGTAAGACGTTGAAGGATAACCGGG
scjk118.1	117083 - 117197	AGCTTTTTTCGCGTCGGAACTCGACCCACAACGTCGGAAATGATCCGGTTCATCGATGAATACCGGAATCGTTTCTCTGTCGAGTTCATCTGTAAGACGTTGAAGGATAACCGGG
scjk463.1	462452 - 462566	AGCTTTTTTCGCGTCGGAACTCGACCCACAACGTCGGAAATGATCCGGTTCATCGATGAATACCGGAATCGTTTCTCTGTCGAGTTCATCTGTAAGACGTTGAAGGATAACCGGG
scjk1484.1	1483232 - 148334	AGCTTTTTTCGCGTCGGAACTCGACCCACAACGTCGGAAATGATCCGGTTCATCGATGAATACCGGAATCGTTTCTCTGTCGAGTTCATCTGTAAGACGTTGAAGGATAACCGGG
scjk1444.1	1443235 - 1443349	AGCTTTTTTCGCGTCGGAACTCGACCCACAACGTCGGAAATGATCCGGTTCATCGATGAATACCGGAATCGTTTCTCTGTCGAGTTCATCTGTAAGACGTTGAAGGATAACCGGG
scjk2091.1	2090313 - 2090427	AGCTTTTTTCGCGTCGGAACTCGACCCACAACGTCGGAAATGATCCGGTTCATCGATGAATACCGGAATCGTTTCTCTGTCGAGTTCATCTGTAAGACGTTGAAGGATAACCGGG
scjk1857.1	1856182 - 1856296	AGCTTTTTTCGCGTCGGAACTCGACCCACAACGTCGGAAATGATCCGGTTCATCGATGAATACCGGAATCGTTTCTCTGTCGAGTTCATCTGTAAGACGTTGAAGGATAACCGGG
scjk1861.1	1860886 - 1861000	AGCTTTTTTCGCGTCGGAACTCGACCCACAACGTCGGAAATGATCCGGTTCATCGATGAATACCGGAATCGTTTCTCTGTCGAGTTCATCTGTAAGACGTTGAAGGATAACCGGG
scjk620.1	619808 - 61992	AGCTTTTTTCGCGTCGGAACTCGACCCACAACGTCGGAAATGATCCGGTTCATCGATGAATACCGGAATCGTTTCTCTGTCGAGTTCATCTGTAAGACGTTGAAGGATAACCGGG
scjk833.1	832580 - 832694	AGCTTTTTTCGCGTCGGAACTCGACCCACAACGTCGGAAATGATCCGGTTCATCGATGAATACCGGAATCGTTTCTCTGTCGAGTTCATCTGTAAGACGTTGAAGGATAACCGGG
